# Supplementary material for: Substrate and catalytic promiscuity of secondary metabolite enzymes: O-prenylation of hydroxyxanthones with different prenyl donors by a bisindolyl benzoquinone C- and N-prenyltransferase
Source: Royal Society of Chemistry journal article supplement (doi:10.1039/c4ra00337c), 2014-01-01
Supplement: c4ra00337c1.pdf [file c4ra00337c1.pdf]

## Supporting Information

### **Substrate and catalytic promiscuity of secondary metabolite enzymes: O-prenylation of hydroxyxanthenes with different prenyl donors by a bisindolyl benzoquinone C- and N-prenyltransferase**

Sylwia Tarcz,<sup>a</sup> Xiulan Xie<sup>b</sup> and Shu-Ming Li<sup>\*a</sup>

<sup>a</sup> Institut für Pharmazeutische Biologie und Biotechnologie, Philipps-Universität Marburg, Deutschhausstrasse 17A, 35037 Marburg, Germany

<sup>b</sup> Fachbereich Chemie, Philipps-Universität Marburg, Hans-Meerwein-Strasse, 35032 Marburg, Germany

\* Correspondence: [shuming.li@staff.uni-marburg.de](mailto:shuming.li@staff.uni-marburg.de)

|                                                                                                                                                  |     |
|--------------------------------------------------------------------------------------------------------------------------------------------------|-----|
| Table S1. Sequence identities of AstPT and homologues. ....                                                                                      | S3  |
| Table S2. <sup>1</sup> H NMR data of <b>1a</b> and enzyme products <b>1b-1d</b> , (CD <sub>3</sub> ) <sub>2</sub> CO, 500 MHz. ....              | S3  |
| Table S3. <sup>1</sup> H NMR data of <b>2a</b> and enzyme products <b>2b1-2d2</b> , (CD <sub>3</sub> ) <sub>2</sub> CO, 500 MHz. ....            | S4  |
| Table S4. <sup>1</sup> H NMR data of <b>3a</b> and enzyme products <b>3b1</b> and <b>3b2</b> , (CD <sub>3</sub> ) <sub>2</sub> CO, 500 MHz. .... | S5  |
| Table S5. <sup>1</sup> H NMR data of <b>4a</b> and enzyme products <b>4c</b> and <b>4d</b> , (CD <sub>3</sub> ) <sub>2</sub> CO, 500 MHz. ....   | S6  |
| Figure S1. HPLC chromatograms of incubation mixtures of XptB with AQ D and 1,7-dihydroxy-6-methyl-8-hydroxymethylxanthone. ....                  | S7  |
| Figure S2. <sup>1</sup> H NMR spectrum of <b>1a</b> in (CD <sub>3</sub> ) <sub>2</sub> CO (500 MHz). ....                                        | S8  |
| Figure S3. <sup>1</sup> H NMR spectrum of <b>1b</b> in (CD <sub>3</sub> ) <sub>2</sub> CO (500 MHz). ....                                        | S8  |
| Figure S4. <sup>1</sup> H NMR spectrum of <b>1c</b> in (CD <sub>3</sub> ) <sub>2</sub> CO (500 MHz). ....                                        | S9  |
| Figure S5. <sup>1</sup> H NMR spectrum of <b>1d</b> in (CD <sub>3</sub> ) <sub>2</sub> CO (500 MHz). ....                                        | S9  |
| Figure S6. <sup>1</sup> H NMR spectrum of <b>2a</b> in (CD <sub>3</sub> ) <sub>2</sub> CO (500 MHz). ....                                        | S10 |
| Figure S7. <sup>1</sup> H NMR spectrum of <b>2b1</b> and <b>2b2</b> in (CD <sub>3</sub> ) <sub>2</sub> CO (500 MHz). ....                        | S10 |
| Figure S8. <sup>1</sup> H NMR spectrum of <b>2c1</b> and <b>2c2</b> in (CD <sub>3</sub> ) <sub>2</sub> CO (500 MHz). ....                        | S11 |
| Figure S9. <sup>1</sup> H NMR spectrum of <b>2d1</b> and <b>2d2</b> in (CD <sub>3</sub> ) <sub>2</sub> CO (500 MHz). ....                        | S11 |
| Figure S10. <sup>1</sup> H NMR spectrum of <b>3a</b> in (CD <sub>3</sub> ) <sub>2</sub> CO (500 MHz). ....                                       | S12 |
| Figure S11. <sup>1</sup> H NMR spectrum of <b>3b1</b> and <b>3b2</b> in (CD <sub>3</sub> ) <sub>2</sub> CO (500 MHz). ....                       | S12 |
| Figure S12. <sup>1</sup> H NMR spectrum of <b>4a</b> in (CD <sub>3</sub> ) <sub>2</sub> CO (500 MHz). ....                                       | S13 |
| Figure S13. <sup>1</sup> H NMR spectrum of <b>4c</b> in (CD <sub>3</sub> ) <sub>2</sub> CO (500 MHz). ....                                       | S13 |
| Figure S14. <sup>1</sup> H NMR spectrum of <b>4d</b> in (CD <sub>3</sub> ) <sub>2</sub> CO (500 MHz). ....                                       | S14 |
| Figure S15. HMBC spectrum of <b>1d</b> in (CD <sub>3</sub> ) <sub>2</sub> SO. ....                                                               | S14 |
| Figure S16. HMBC correlations of <b>1d</b> . ....                                                                                                | S15 |
| Figure S17. Determination of kinetic parameters for <b>1a</b> . ....                                                                             | S15 |
| Figure S18. Determination of kinetic parameters for <b>2a</b> . ....                                                                             | S16 |
| Figure S19. Determination of kinetic parameters for <b>3a</b> . ....                                                                             | S16 |
| Figure S20. Determination of kinetic parameters for <b>4a</b> . ....                                                                             | S16 |
| Figure S21. Determination of kinetic parameters for DMAPP. ....                                                                                  | S16 |
| Figure S22. Determination of kinetic parameters for GPP. ....                                                                                    | S16 |
| Figure S23. Determination of kinetic parameters for FPP. ....                                                                                    | S18 |
| Figure S24. Multiple sequence alignment of AstPT and homologues by Clustal Omega. ...                                                            | S19 |

**Table S1.** Sequence identities of AstPT and homologues.

| Enzyme         | TdiB | AstPT | XptB | FgaPT2 | FtmPT1 | 7-DMATS | AnaPT | CdpNPT |
|----------------|------|-------|------|--------|--------|---------|-------|--------|
| <b>CdpNPT</b>  | 25   | 24    | 24   | 31     | 28     | 25      | 32    | 100    |
| <b>AnaPT</b>   | 26   | 23    | 26   | 31     | 30     | 30      | 100   |        |
| <b>7-DMATS</b> | 23   | 26    | 27   | 31     | 26     | 100     |       |        |
| <b>FtmPT1</b>  | 20   | 23    | 26   | 36     | 100    |         |       |        |
| <b>FgaPT2</b>  | 26   | 25    | 27   | 100    |        |         |       |        |
| <b>XptB</b>    | 25   | 23    | 100  |        |        |         |       |        |
| <b>AstPT</b>   | 45   | 100   |      |        |        |         |       |        |
| <b>TdiB</b>    | 100  |       |      |        |        |         |       |        |

Sequence identities are given in percentage. TdiB (ABU51603.1) and XptB (BN001302.1) are from *Aspergillus nidulans*, AstPT (EAU29429.1) from *Aspergillus terreus*, FgaPT2 (AAX08549.1), FtmPT1 (AAX56314.1), 7-DMATS (ABS89001.1) and CdpNPT (ABR14712.1) are from *Aspergillus fumigatus*, AnaPT (EAW16181.1) is from *Neosartorya fischeri*.

**Table S2.** <sup>1</sup>H NMR data of **1a** and enzyme products **1b-1d**, (CD<sub>3</sub>)<sub>2</sub>CO, 500 MHz.

| Compound    | 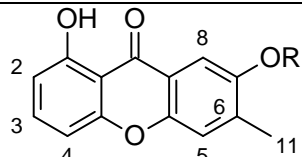 |                                                                                                  |                                                                                                   |                                                                                                    |
|-------------|-----------------------------------------------------------------------------------|--------------------------------------------------------------------------------------------------|---------------------------------------------------------------------------------------------------|----------------------------------------------------------------------------------------------------|
|             | <b>1a:</b> R= H                                                                   | <b>1b:</b> R=  | <b>1c:</b> R=  | <b>1d:</b> R=  |
| Proton      | $\delta_H$ , mult., J                                                             | $\delta_H$ , mult., J                                                                            | $\delta_H$ , mult., J                                                                             | $\delta_H$ , mult., J                                                                              |
| <b>OH-1</b> | 12.83, s                                                                          | 12.82, s                                                                                         | 12.82, s                                                                                          | 12.82, s                                                                                           |
| <b>2</b>    | 6.74, dd, 8.3, 0.9                                                                | 6.77, dd, 8.3, 0.9                                                                               | 6.77, dd, 8.3, 0.8                                                                                | 6.77, dd, 8.3, 0.9                                                                                 |
| <b>3</b>    | 7.67, t, 8.3                                                                      | 7.69, t, 8.3                                                                                     | 7.69, t, 8.3                                                                                      | 7.69, t, 8.3                                                                                       |
| <b>4</b>    | 6.98, dd, 8.3, 0.9                                                                | 7.01, dd, 8.3, 0.9                                                                               | 7.01, dd, 8.3, 0.8                                                                                | 7.01, dd, 8.3, 0.9                                                                                 |
| <b>5</b>    | 7.40, q, 0.9                                                                      | 7.46, q, 0.8                                                                                     | 7.46, br s                                                                                        | 7.46, br s                                                                                         |
| <b>OH-7</b> | 12.83, s                                                                          | -                                                                                                | -                                                                                                 | -                                                                                                  |
| <b>8</b>    | 7.58, s                                                                           | 7.57, s                                                                                          | 7.57, s                                                                                           | 7.56, s                                                                                            |
| <b>11</b>   | 2.37, d, 0.9                                                                      | 2.39, d, 0.8                                                                                     | 2.39, s                                                                                           | 2.39, d, 0.8                                                                                       |
| <b>1'</b>   | -                                                                                 | 4.75, d, 6.6                                                                                     | 4.78, d, 6.7                                                                                      | 4.79, d, 6.5                                                                                       |
| <b>2'</b>   | -                                                                                 | 5.54, t, 6.6                                                                                     | 5.54, td, 6.5, 1.2                                                                                | 5.53, td, 6.4, 1.2                                                                                 |
| <b>4'</b>   | -                                                                                 | 1.83, br s <sup>a</sup>                                                                          | 2.14, m                                                                                           | 2.15, m                                                                                            |
| <b>5'</b>   | -                                                                                 | 1.81, br s <sup>a</sup>                                                                          | 2.14, m                                                                                           | 2.15, m                                                                                            |
| <b>6'</b>   | -                                                                                 | -                                                                                                | 5.11, t, 6.6                                                                                      | 5.13, t, 6.6                                                                                       |
| <b>8'</b>   | -                                                                                 | -                                                                                                | 1.62, br s <sup>b</sup>                                                                           | 2.02, m                                                                                            |
| <b>9'</b>   | -                                                                                 | -                                                                                                | 1.85, s                                                                                           | 2.02, m                                                                                            |
| <b>10'</b>  | -                                                                                 | -                                                                                                | 1.59, s <sup>b</sup>                                                                              | 5.03, t, 7.0                                                                                       |
| <b>12'</b>  | -                                                                                 | -                                                                                                | -                                                                                                 | 1.62, br s <sup>c</sup>                                                                            |
| <b>13'</b>  | -                                                                                 | -                                                                                                | -                                                                                                 | 1.86, s                                                                                            |
| <b>14'</b>  | -                                                                                 | -                                                                                                | -                                                                                                 | 1.60, s                                                                                            |
| <b>15'</b>  | -                                                                                 | -                                                                                                | -                                                                                                 | 1.55, s <sup>c</sup>                                                                               |

J values are given in Hz. <sup>a-c</sup>: Signals with same letters are interchangeable.

**Table S3.** <sup>1</sup>H NMR data of **2a** and enzyme products **2b1-2d2**, (CD<sub>3</sub>)<sub>2</sub>CO, 500 MHz.

| Compound | 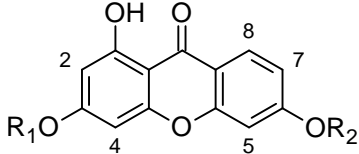 |                                |                                |                                |                                |                                |                                |
|----------|------------------------------------------------------------------------------------|--------------------------------|--------------------------------|--------------------------------|--------------------------------|--------------------------------|--------------------------------|
|          | <b>2a</b><br>R <sub>1</sub> = R <sub>2</sub> = H                                   | <b>2b1</b><br>R <sub>1</sub> = | <b>2b2</b><br>R <sub>2</sub> = | <b>2c1</b><br>R <sub>1</sub> = | <b>2c2</b><br>R <sub>2</sub> = | <b>2d1</b><br>R <sub>1</sub> = | <b>2d2</b><br>R <sub>2</sub> = |
| Proton   | δ <sub>H</sub> , mult., J                                                          | δ <sub>H</sub> , mult., J      | δ <sub>H</sub> , mult., J      | δ <sub>H</sub> , mult., J      | δ <sub>H</sub> , mult., J      | δ <sub>H</sub> , mult., J      | δ <sub>H</sub> , mult., J      |
| OH-1     | 13.12, s                                                                           | -                              | 13.06, s                       | 13.03, s                       | -                              | 13.05, s                       | -                              |
| 2        | 6.23, d, 2.2                                                                       | 6.29, d, 2.3                   | 6.24, d, 2.1                   | 6,10, d, 2,0                   | 6.21, d, 2.2                   | 6.19, d, 2.1                   | 6.25, d, 2.3                   |
| OH-3     | 13.12, s                                                                           | -                              | 13.06, s                       | -                              | -                              | -                              | -                              |
| 4        | 6.39, d, 2.2                                                                       | 6.49, d, 2.3                   | 6.41, d, 2.1                   | 6.25, d, 2.0                   | 6.42, d, 2.2                   | 6.35, d, 2.1                   | 6.45, d, 2.3                   |
| 5        | 6.88, d, 2.3                                                                       | 6.87, d, 2.2                   | 7.01, s                        | 6.94, s                        | 6.60, d <sup>d</sup>           | 6.97, d, 2.3                   | 6.76, d, 2.1                   |
| OH-6     | 13.12, s                                                                           | -                              | -                              | 13.03, s                       | -                              | 13,05, s                       | -                              |
| 7        | 6.96, dd, 8.7, 2.3                                                                 | 6.95, dd, 8.8, 2.2             | 7.01, dd, 8.6, 2.4             | 6.93, dd, 7.9, 2.0             | 6.74, dd <sup>d</sup>          | 6.97, dd, 9.5, 2.3             | 6.87, dd, 8.6, 2.1             |
| 8        | 8.05, d, 8.7                                                                       | 8.03, d, 8.8                   | 8.07, dd, 8.6, 0.5             | 8.02, m                        | 7.90, d, 8.7                   | 8.05, d                        | 7.98, d, 9.1                   |
| 1'       | -                                                                                  | 4.70, d, 6.5                   | 4.76, d, 6.7                   | 4.76, d, 6.5                   | 4.69, d, 6.8                   | 4.78, d, 6.3                   | 4.72, d, 6.1                   |
| 2'       | -                                                                                  | 5.50, t, 6.5                   | 5.53, t, 6.7                   | 5.52, t, 6.5                   | - <sup>e</sup>                 | 5.53, t, 6.3                   | - <sup>f</sup>                 |
| 4'       | -                                                                                  | 1.78, s                        | 1.80, s                        | 2.14, m                        | - <sup>e</sup>                 | 2.14, m                        | - <sup>f</sup>                 |
| 5'       | -                                                                                  | 1.78, s                        | 1.80, s                        | 2.14, m                        | - <sup>e</sup>                 | 2.14, m                        | - <sup>f</sup>                 |
| 6'       | -                                                                                  | -                              | -                              | 5.11, t, 6.9                   | - <sup>e</sup>                 | 5.13, t, 6.8                   | - <sup>f</sup>                 |
| 8'       | -                                                                                  | -                              | -                              | 1.63, br s <sup>a</sup>        | 1.57, s <sup>b</sup>           | 1.94, m                        | - <sup>f</sup>                 |
| 9'       | -                                                                                  | -                              | -                              | 1.80, br s                     | 1.79, s                        | 1.94, m                        | - <sup>f</sup>                 |
| 10'      | -                                                                                  | -                              | -                              | 1.59, br s <sup>a</sup>        | 1.56, s <sup>b</sup>           | 5.05, t, 7.0                   | - <sup>f</sup>                 |
| 12'      | -                                                                                  | -                              | -                              | -                              | -                              | 1.63, br s <sup>c</sup>        | 1.65, s                        |
| 13'      | -                                                                                  | -                              | -                              | -                              | -                              | 1.81, br s                     | 1.80, d, 1.2                   |
| 14'      | -                                                                                  | -                              | -                              | -                              | -                              | 1.60, br s                     | 1.59, s                        |
| 15'      | -                                                                                  | -                              | -                              | -                              | -                              | 1.56, br s <sup>c</sup>        | 1.56, s <sup>f</sup>           |

J values are given in Hz. <sup>a-c</sup>: Signals with same letters are interchangeable. <sup>d</sup>: Due to low product amount coupling constants could not be determined. <sup>e</sup>: Signals overlap with those of **2c1**. <sup>f</sup>: Signals overlap with those of **2d1**.

**Table S4.**  $^1\text{H}$  NMR data of **3a** and enzyme products **3b1** and **3b2**,  $(\text{CD}_3)_2\text{CO}$ , 500 MHz.

| Compound | 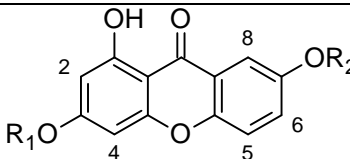 |                                                                                   |                                  |
|----------|-----------------------------------------------------------------------------------|-----------------------------------------------------------------------------------|----------------------------------|
|          | <b>3a</b><br>$\text{R}_1 = \text{R}_2 = \text{H}$                                 | <b>3b1</b><br>$\text{R}_1 =$                                                      | <b>3b2</b><br>$\text{R}_2 =$     |
|          |                                                                                   |  |                                  |
| Proton   | $\delta_{\text{H}}$ , mult., $J$                                                  | $\delta_{\text{H}}$ , mult., $J$                                                  | $\delta_{\text{H}}$ , mult., $J$ |
| OH-1     | 12.99, s                                                                          | -                                                                                 | 12.96, s                         |
| 2        | 6.25, d, 2.1                                                                      | 6.33, d, 2.3                                                                      | 6.28, d, 2.1                     |
| OH-3     | 12.99, s                                                                          | -                                                                                 | 12.96, s                         |
| 4        | 6.41, d, 2.1                                                                      | 6.53, d, 2.3                                                                      | 6.45, d, 2.1                     |
| 5        | 7.45, d, 9.0                                                                      | 7.47, dd, 9.1, 0.4                                                                | 7.50, dd, 9.1, 0.4               |
| 6        | 7.36, dd, 9.0, 3.0                                                                | 7.38, dd, 9.1, 3.0                                                                | 7.42, dd, 9.1, 3.1               |
| OH-7     | 12.99 s                                                                           | -                                                                                 | -                                |
| 8        | 7.57, d, 3.0                                                                      | 7.58, d, 3.0                                                                      | 7.60, d, 3.1                     |
| 1'       | -                                                                                 | 4.72, d, 6.9                                                                      | 4.70, d, 6.6                     |
| 2'       | -                                                                                 | 5.35, t, 5.2                                                                      | 5.50, t, 6.6                     |
| 4'       | -                                                                                 | 1.81 <sup>a</sup>                                                                 | 1.81, s <sup>a</sup>             |
| 5'       | -                                                                                 | 1.79 <sup>a</sup>                                                                 | 1.79, s <sup>a</sup>             |

$J$  values are given in Hz. <sup>a</sup>: Signals are interchangeable.

**Table S5.**  $^1\text{H}$  NMR data of **4a** and enzyme products **4c** and **4d**,  $(\text{CD}_3)_2\text{CO}$ , 500 MHz.

| Compound | 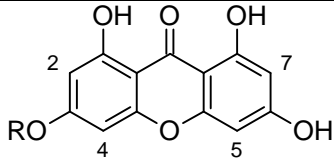 |                                                                                                    |                                                                                                     |
|----------|-----------------------------------------------------------------------------------|----------------------------------------------------------------------------------------------------|-----------------------------------------------------------------------------------------------------|
|          | <b>4a</b><br>R = H                                                                | <b>4c</b><br>R =  | <b>4d</b><br>R =  |
| Proton   | $\delta_{\text{H}}$ , mult., $J$                                                  | $\delta_{\text{H}}$ , mult., $J$                                                                   | $\delta_{\text{H}}$ , mult., $J$                                                                    |
| OH-1     | 11.99, s                                                                          | -                                                                                                  | 12.16, s                                                                                            |
| 2        | 6.25, d, 2.2                                                                      | 6.33, d, 2.3 <sup>a</sup>                                                                          | 6.28, d, 2.3 <sup>d</sup>                                                                           |
| OH-3     | 11.99, s                                                                          | -                                                                                                  | -                                                                                                   |
| 4        | 6.38, d, 2.2                                                                      | 6.51, d, 2.3 <sup>b</sup>                                                                          | 6.46, d, 2.3 <sup>e</sup>                                                                           |
| 5        | 6.38, d, 2.2                                                                      | 6.41, d, 2.1 <sup>b</sup>                                                                          | 6.32, d, 1.9 <sup>e</sup>                                                                           |
| OH-6     | 11.99, s                                                                          | -                                                                                                  | 11.91, s                                                                                            |
| 7        | 6.25, d, 2.2                                                                      | 6.26, d, 2.1 <sup>a</sup>                                                                          | 6.18, d, 1.9 <sup>d</sup>                                                                           |
| OH-8     | 11.99, s                                                                          | -                                                                                                  | 12.16, s                                                                                            |
| 1'       | -                                                                                 | 4.75, d, 6.6                                                                                       | 4.74, d, 6.6                                                                                        |
| 2'       | -                                                                                 | 5.50, td, 6.6, 1.4                                                                                 | 5.49, td, 6.6, 1.3                                                                                  |
| 4'       | -                                                                                 | 2.13, m                                                                                            | 2.15, m                                                                                             |
| 5'       | -                                                                                 | 2.13, m                                                                                            | 2.15, m                                                                                             |
| 6'       | -                                                                                 | 5.12, t, 6.9                                                                                       | 5.13, t, 7.0                                                                                        |
| 8'       | -                                                                                 | 1.64, br s <sup>c</sup>                                                                            | 2.05, m                                                                                             |
| 9'       | -                                                                                 | 1.80, br s                                                                                         | 2.05, m                                                                                             |
| 10'      | -                                                                                 | 1.60, br s <sup>c</sup>                                                                            | 5.06, t, 7.1                                                                                        |
| 12'      | -                                                                                 | -                                                                                                  | 1.61, br s <sup>f</sup>                                                                             |
| 13'      | -                                                                                 | -                                                                                                  | 1.80, br s                                                                                          |
| 14'      | -                                                                                 | -                                                                                                  | 1.63, br s                                                                                          |
| 15       | -                                                                                 | -                                                                                                  | 1.56, br s <sup>f</sup>                                                                             |

$J$  values are given in Hz.<sup>a-f</sup>: Signals with same letters are interchangeable.

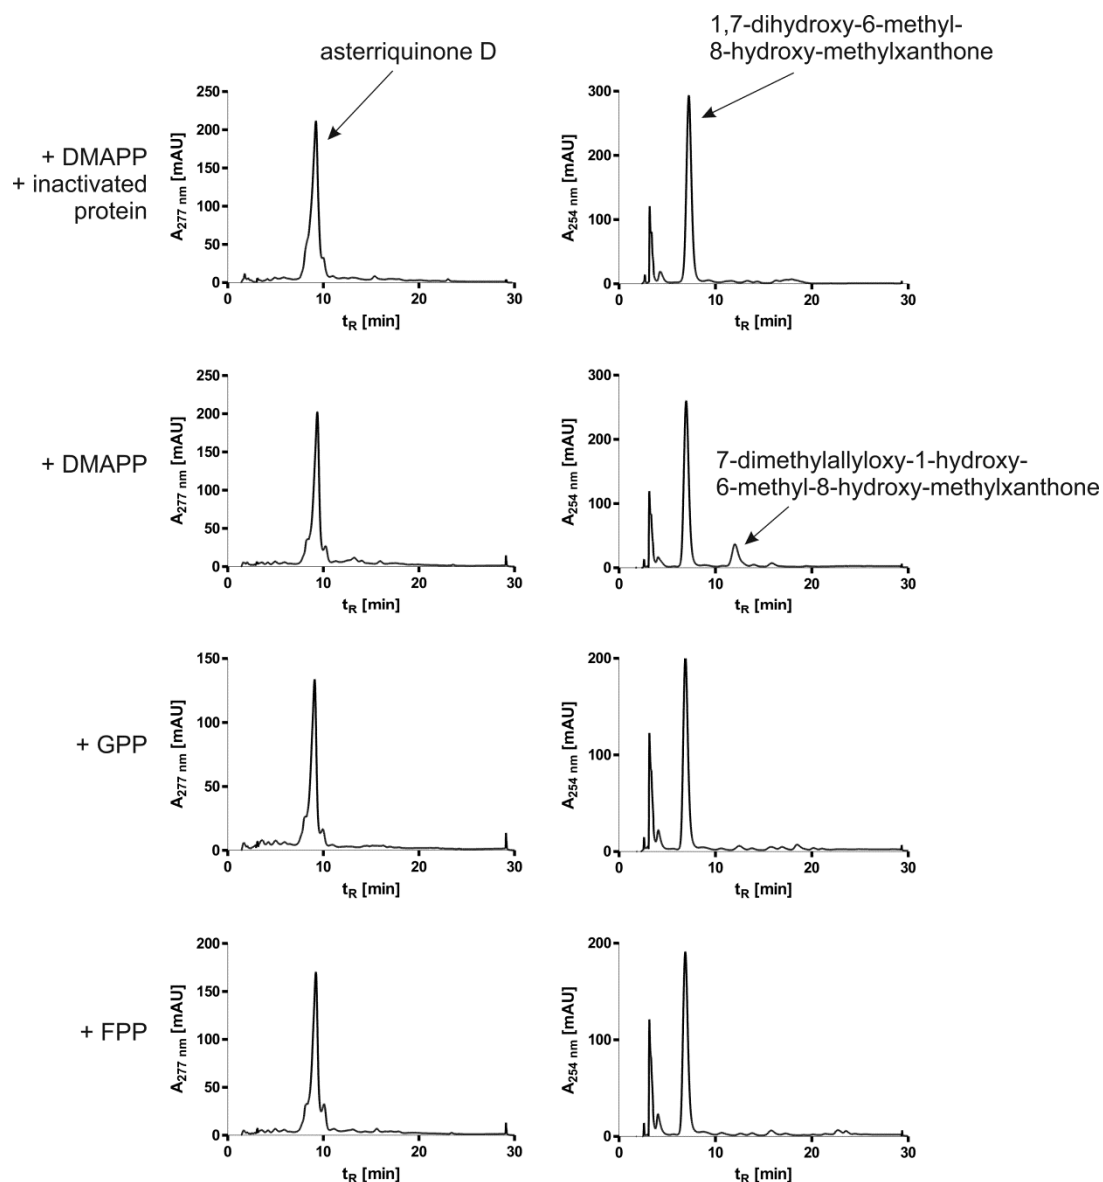

**Figure S1.** HPLC chromatograms of incubation mixtures of XptB with AQ D and 1,7-dihydroxy-6-methyl-8-hydroxymethylxanthone.

Assays with XptB were incubated for 16 h at 37 °C and subsequently extracted three times with ethyl acetate. Chromatograms of incubations with inactivated protein, with DMAPP, GPP and FPP as prenyl donors are shown. Incubation of XptB with 1,7-dihydroxy-6-methyl-8-hydroxymethylxanthone in the presence of DMAPP serves as positive control.

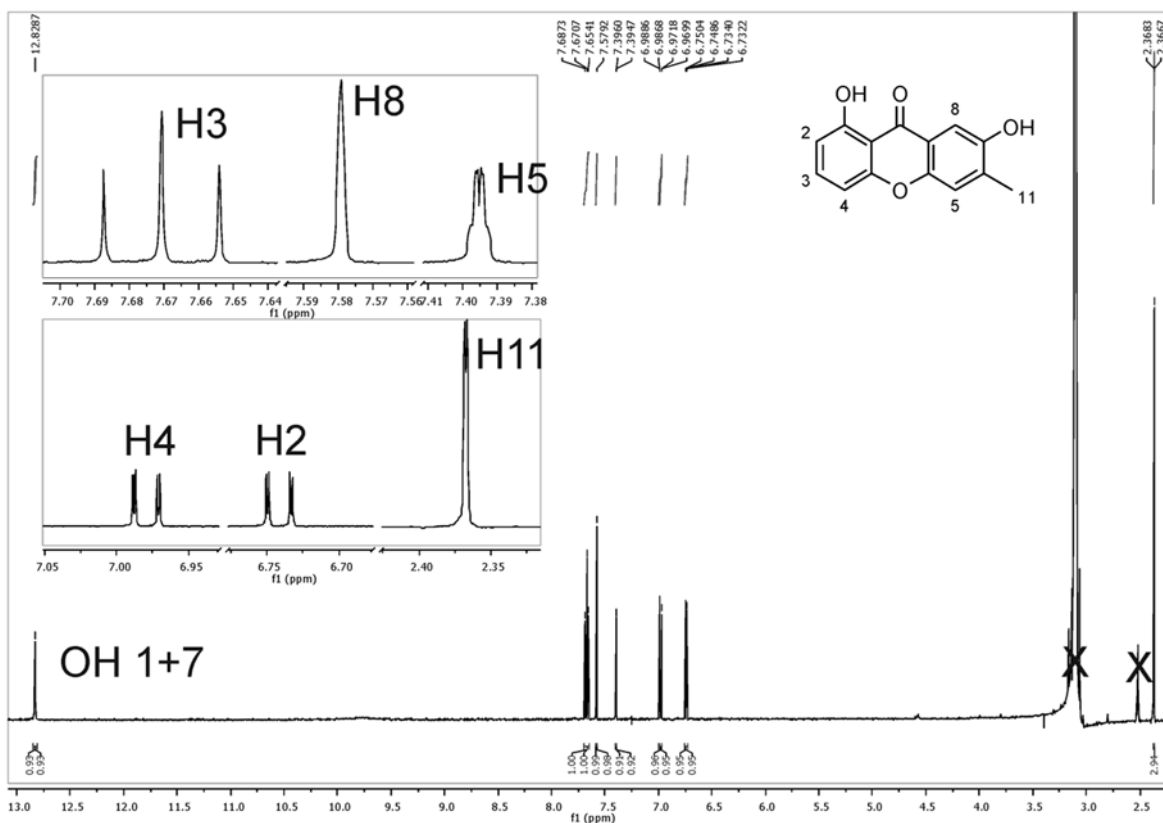

Figure S2. <sup>1</sup>H NMR spectrum of **1a** in (CD<sub>3</sub>)<sub>2</sub>CO (500 MHz).

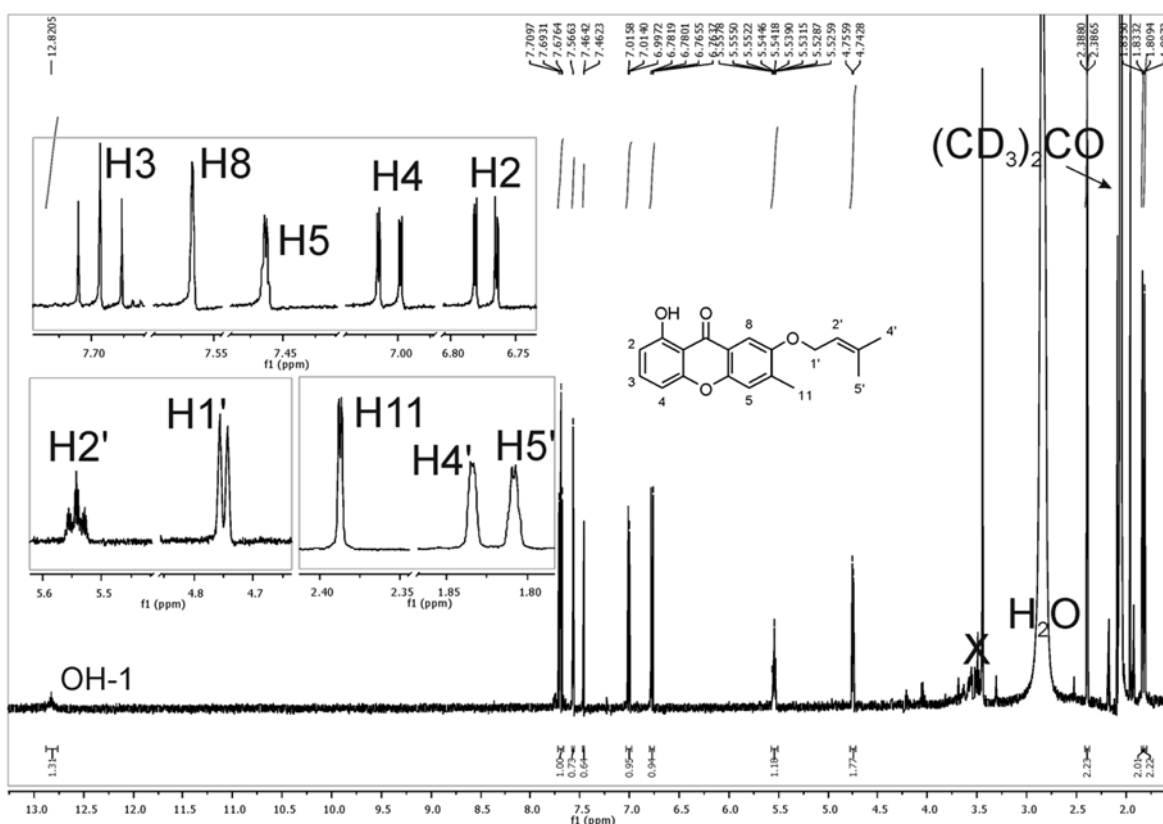

Figure S3. <sup>1</sup>H NMR spectrum of **1b** in (CD<sub>3</sub>)<sub>2</sub>CO (500 MHz).



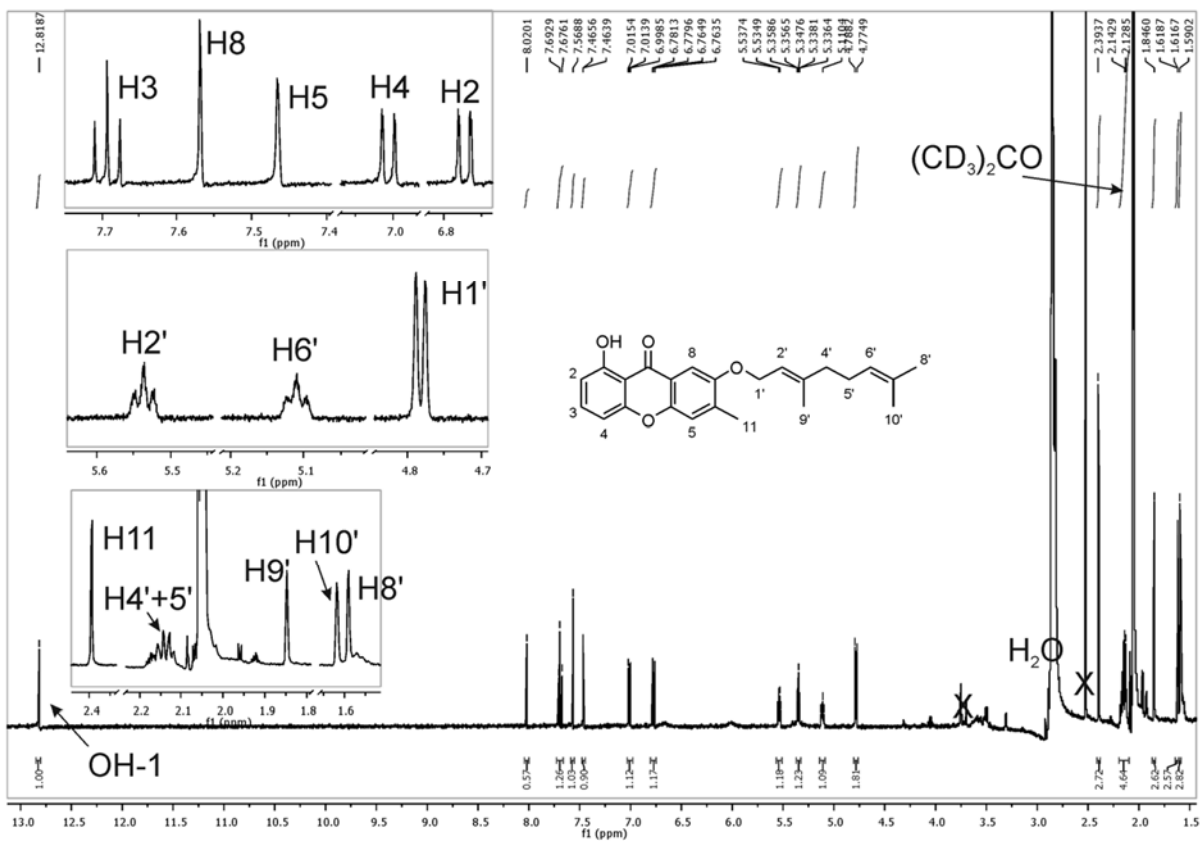

**Figure S4.** <sup>1</sup>H NMR spectrum of **1c** in (CD<sub>3</sub>)<sub>2</sub>CO (500 MHz).

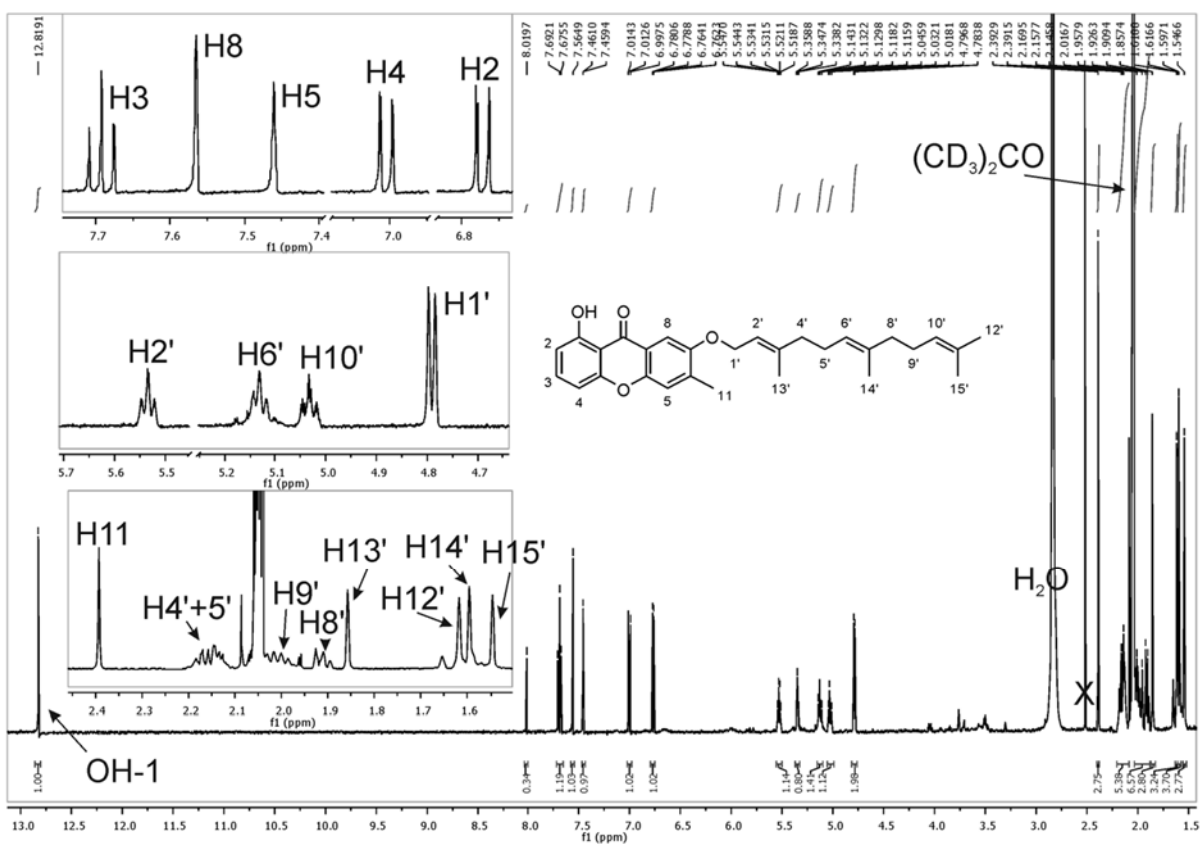

**Figure S5.** <sup>1</sup>H NMR spectrum of **1d** in (CD<sub>3</sub>)<sub>2</sub>CO (500 MHz).

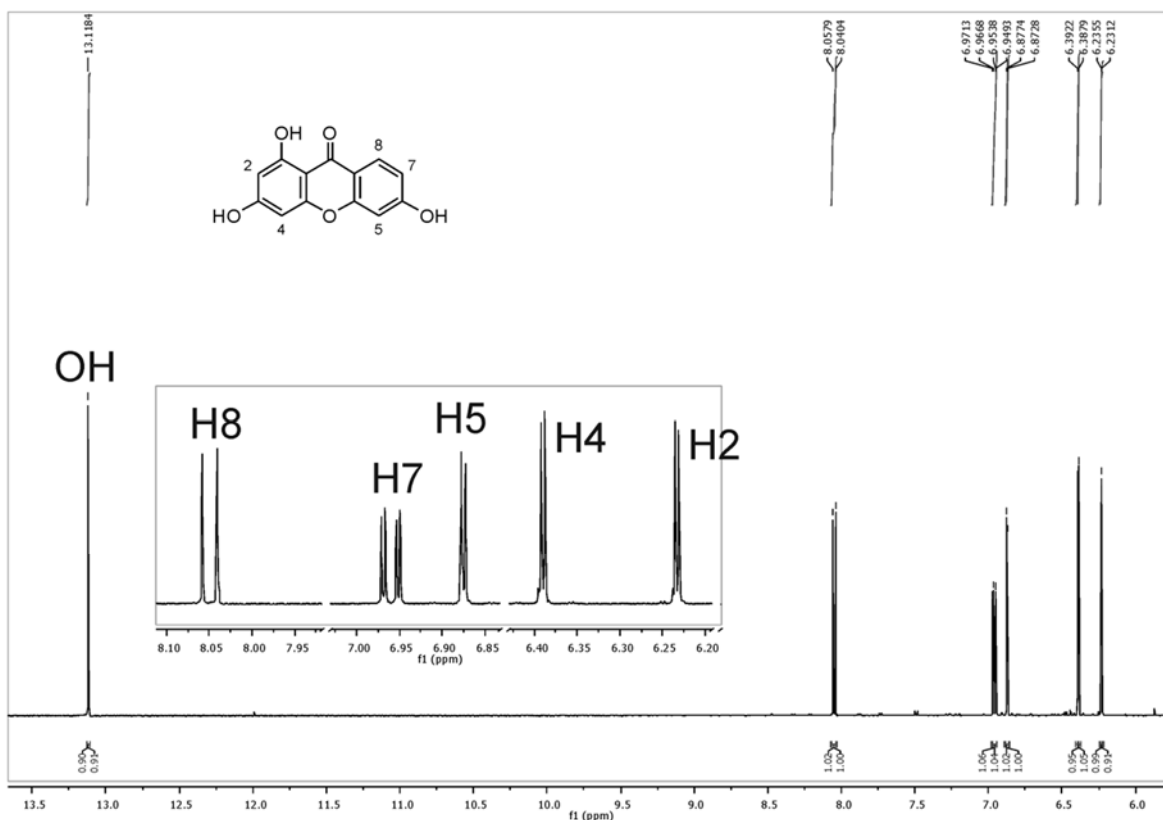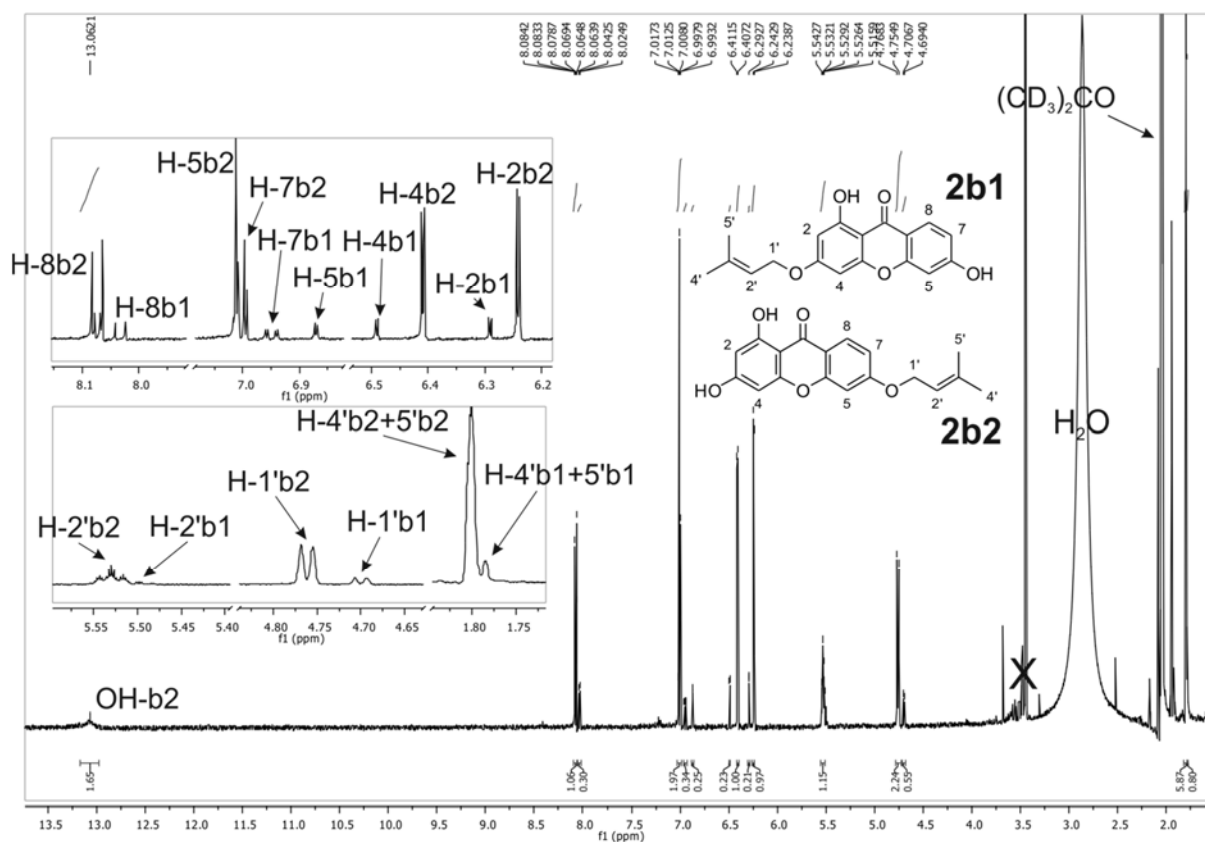

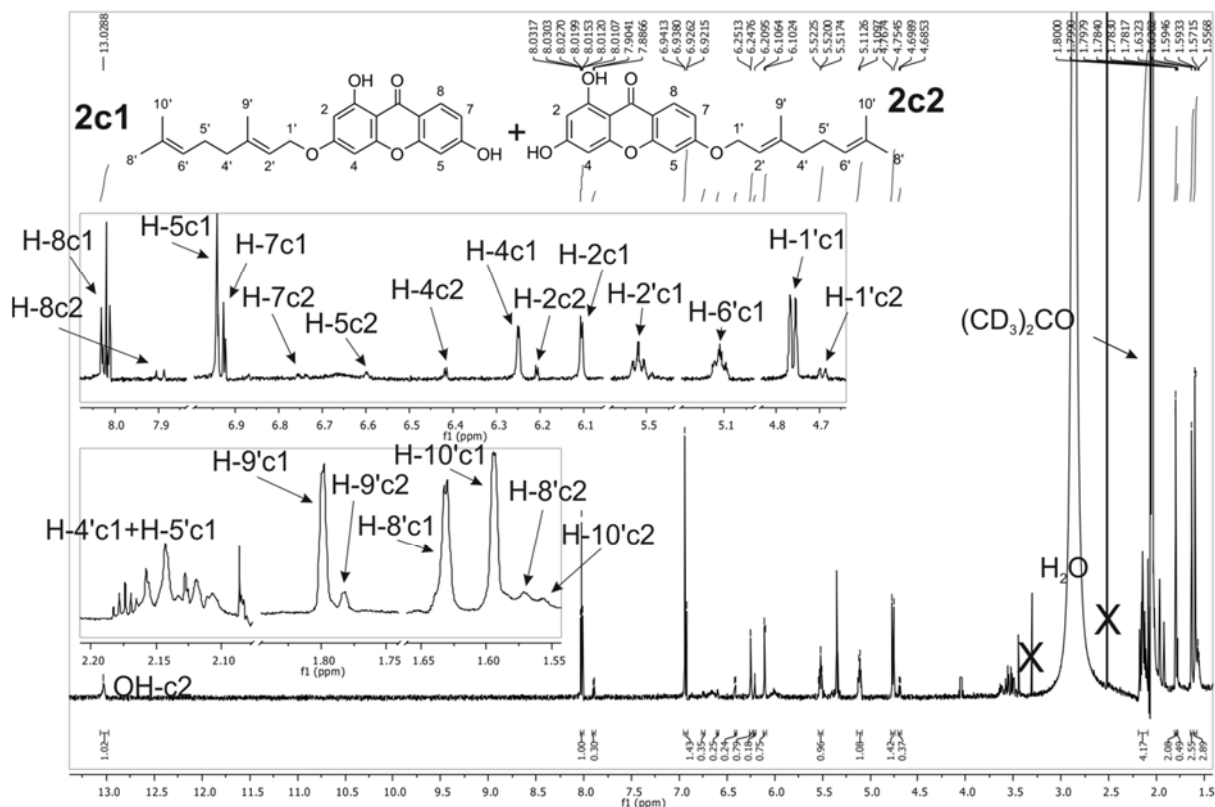

Figure S8. <sup>1</sup>H NMR spectrum of **2c1** and **2c2** in (CD<sub>3</sub>)<sub>2</sub>CO (500 MHz).

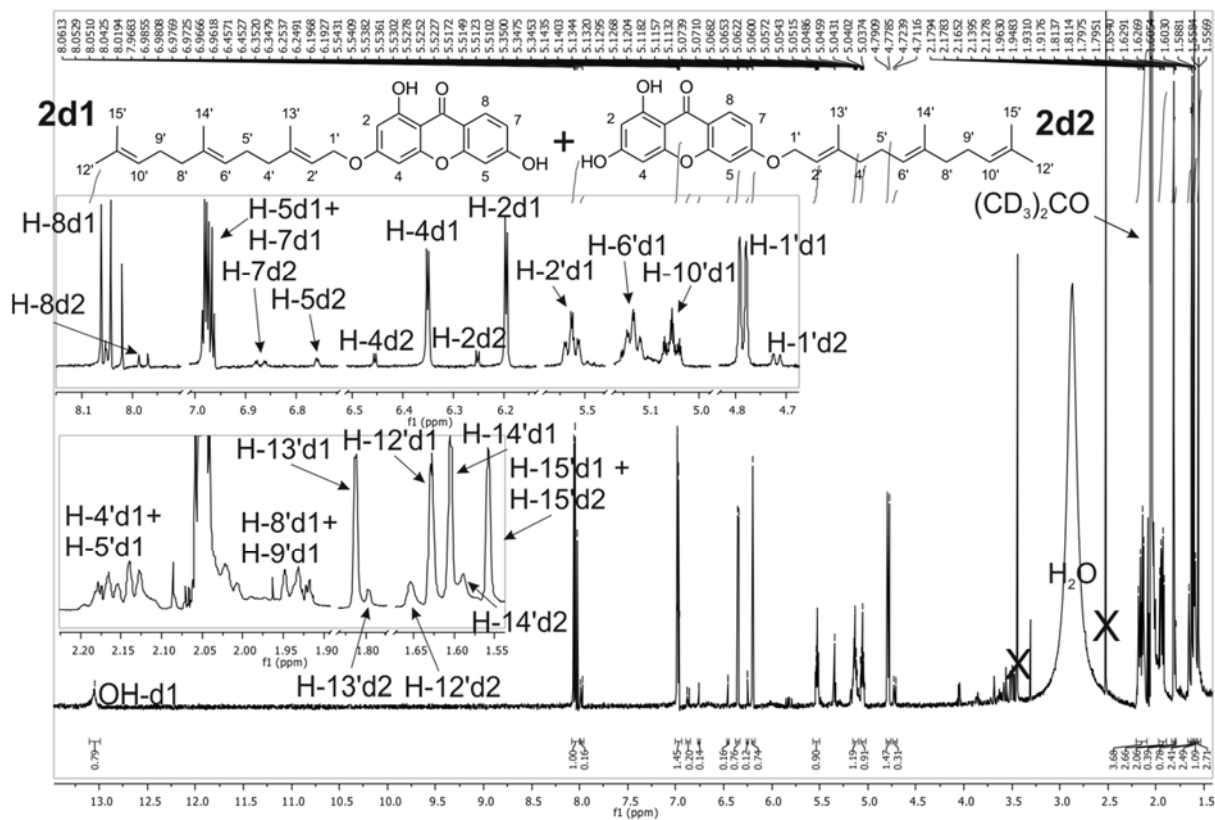

Figure S9. <sup>1</sup>H NMR spectrum of **2d1** and **2d2** in (CD<sub>3</sub>)<sub>2</sub>CO (500 MHz).

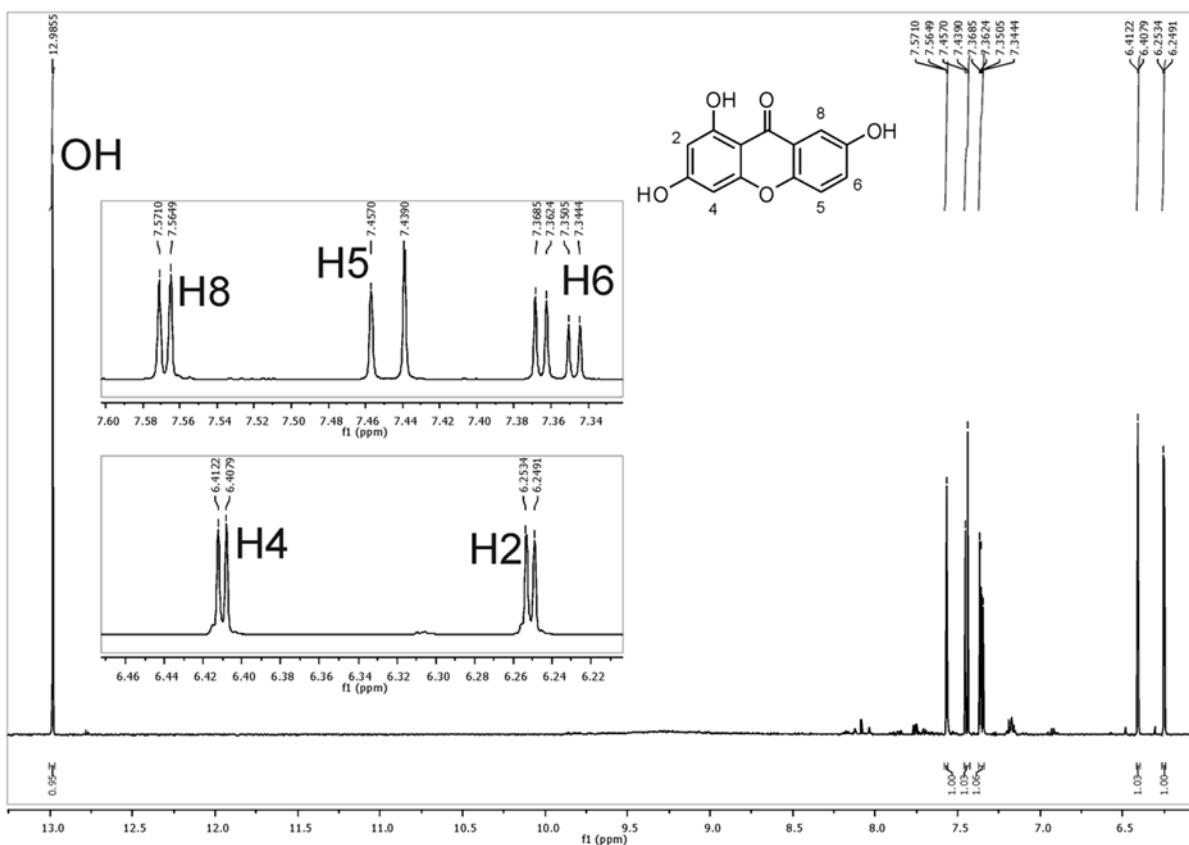

**Figure S10.**  $^1\text{H}$  NMR spectrum of **3a** in  $(\text{CD}_3)_2\text{CO}$  (500 MHz).

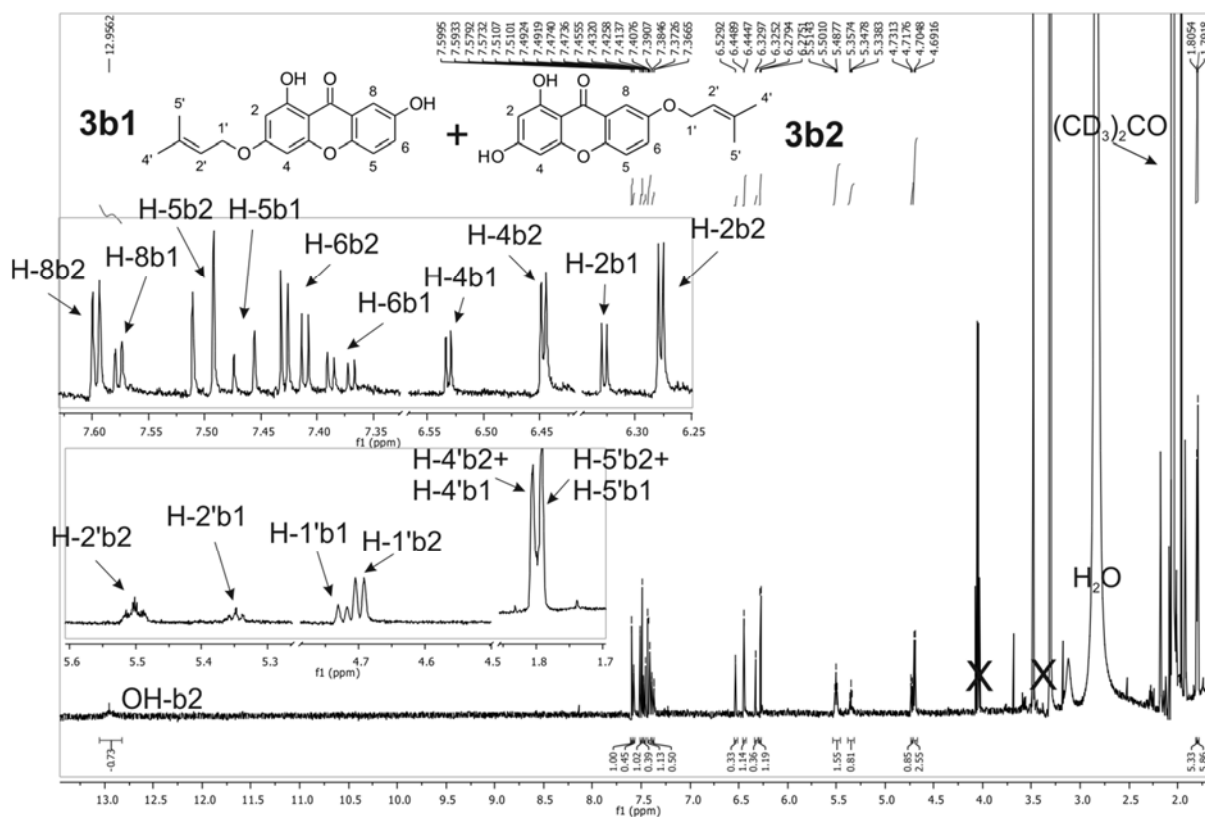

**Figure S11.**  $^1\text{H}$  NMR spectrum of **3b1** and **3b2** in  $(\text{CD}_3)_2\text{CO}$  (500 MHz).

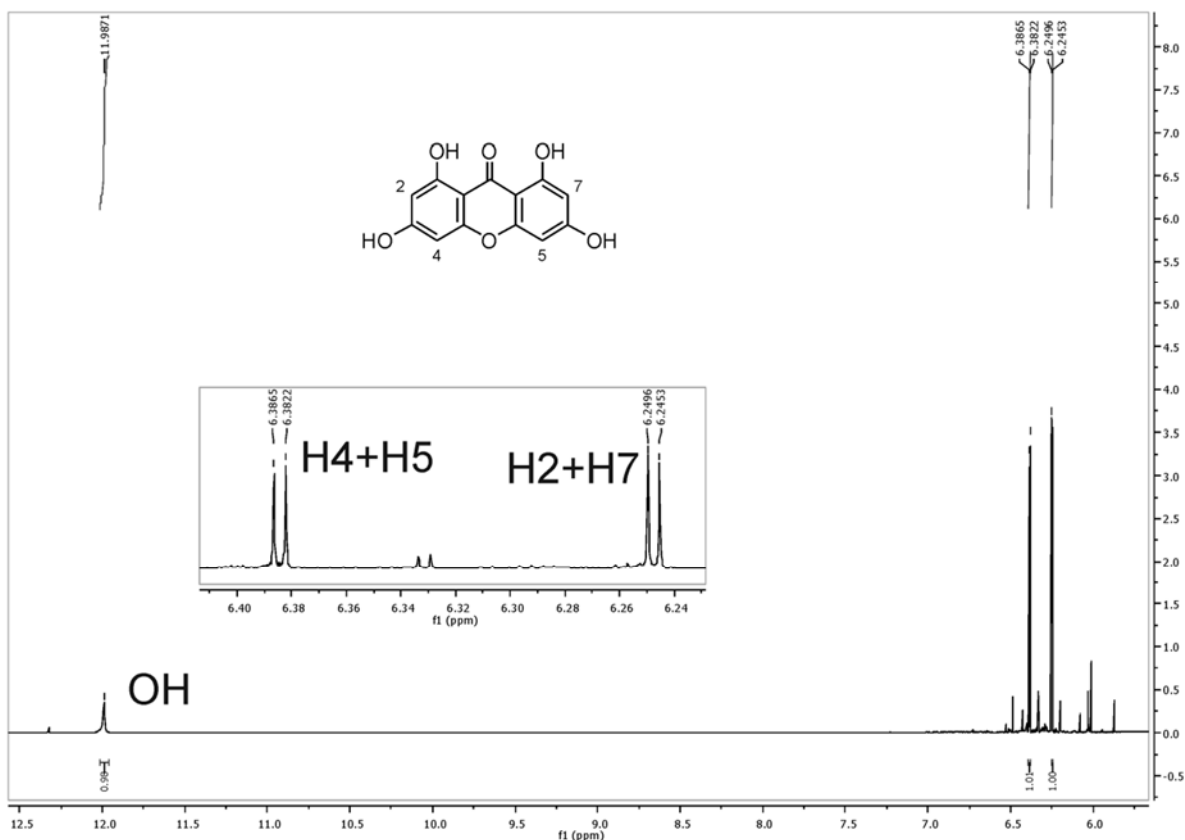

**Figure S12.**  $^1\text{H}$  NMR spectrum of **4a** in  $(\text{CD}_3)_2\text{CO}$  (500 MHz).

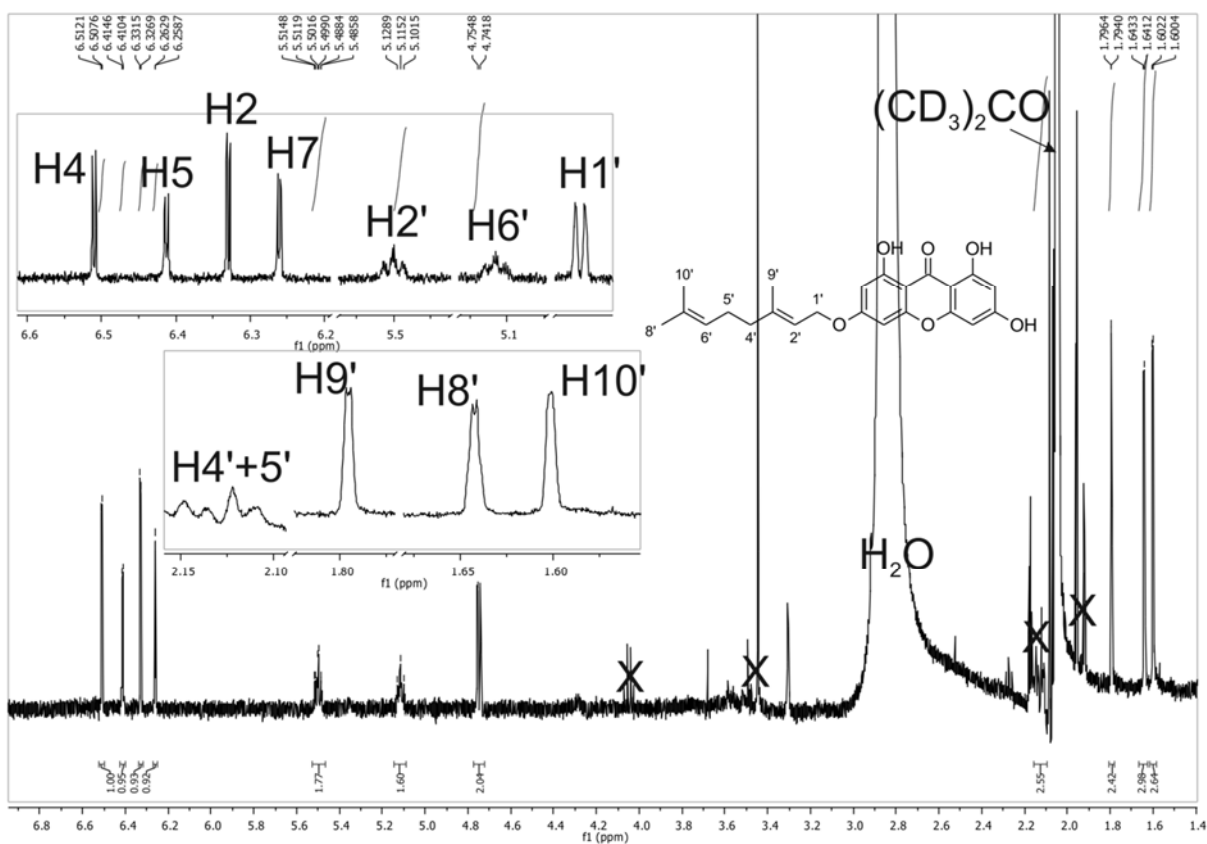

**Figure S13.**  $^1\text{H}$  NMR spectrum of **4c** in  $(\text{CD}_3)_2\text{CO}$  (500 MHz).

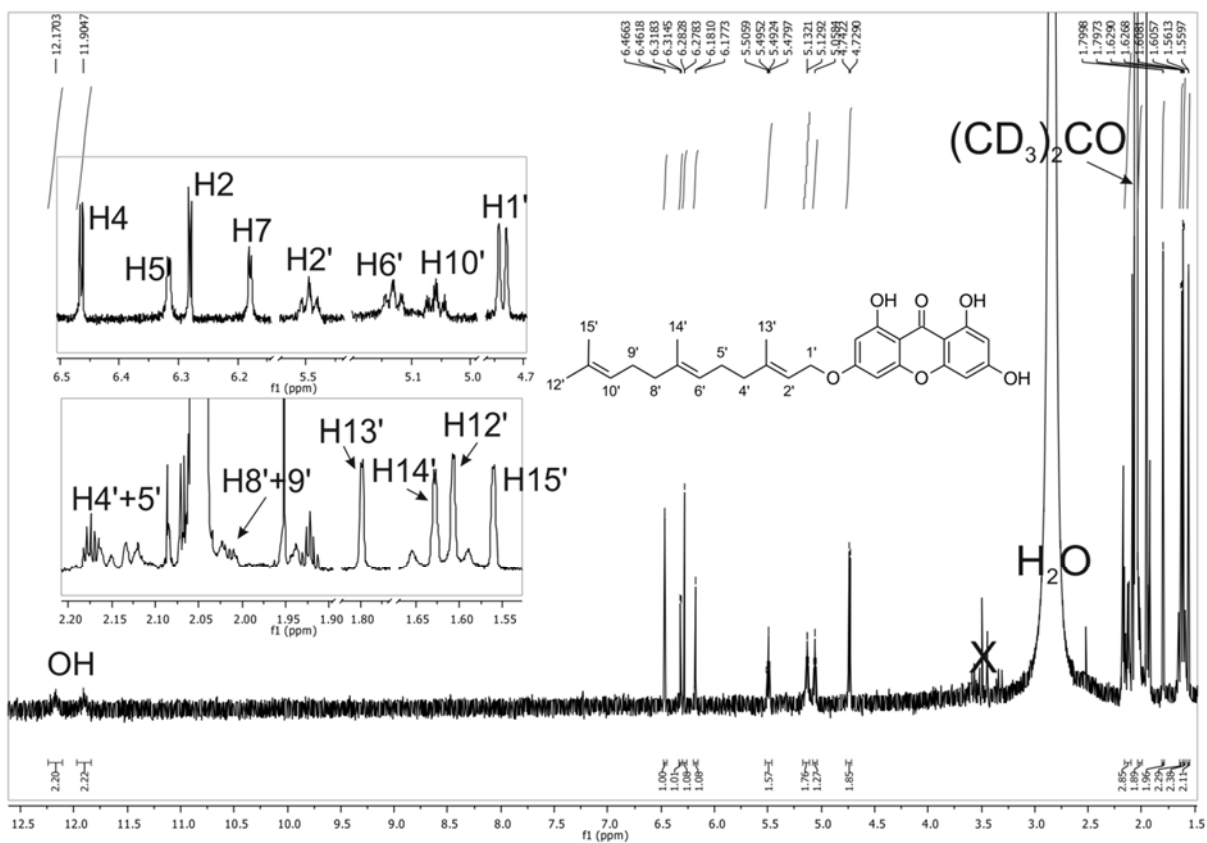

Figure S14.  $^1\text{H}$  NMR spectrum of **4d** in  $(\text{CD}_3)_2\text{CO}$  (500 MHz).

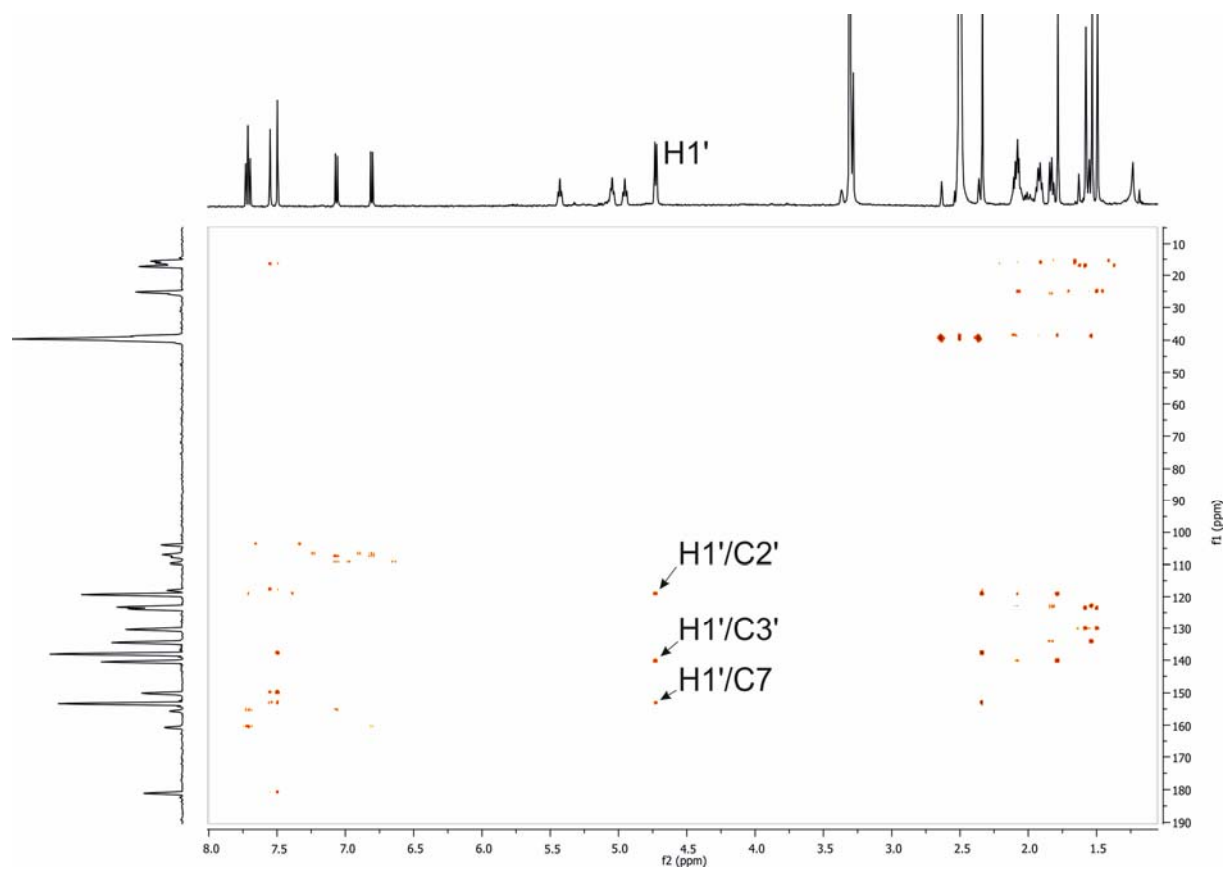

Figure S15. HMBC spectrum of **1d** in  $(\text{CD}_3)_2\text{SO}$ .

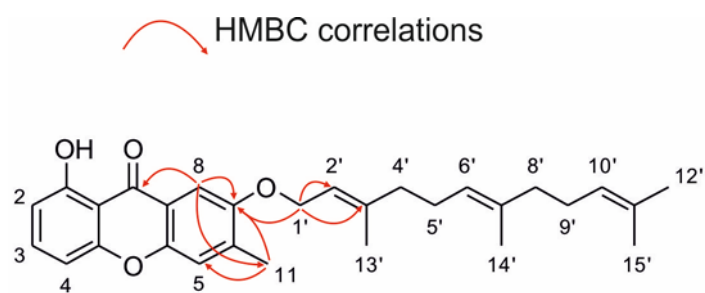

**Figure S16.** HMBC correlations of **1d**.

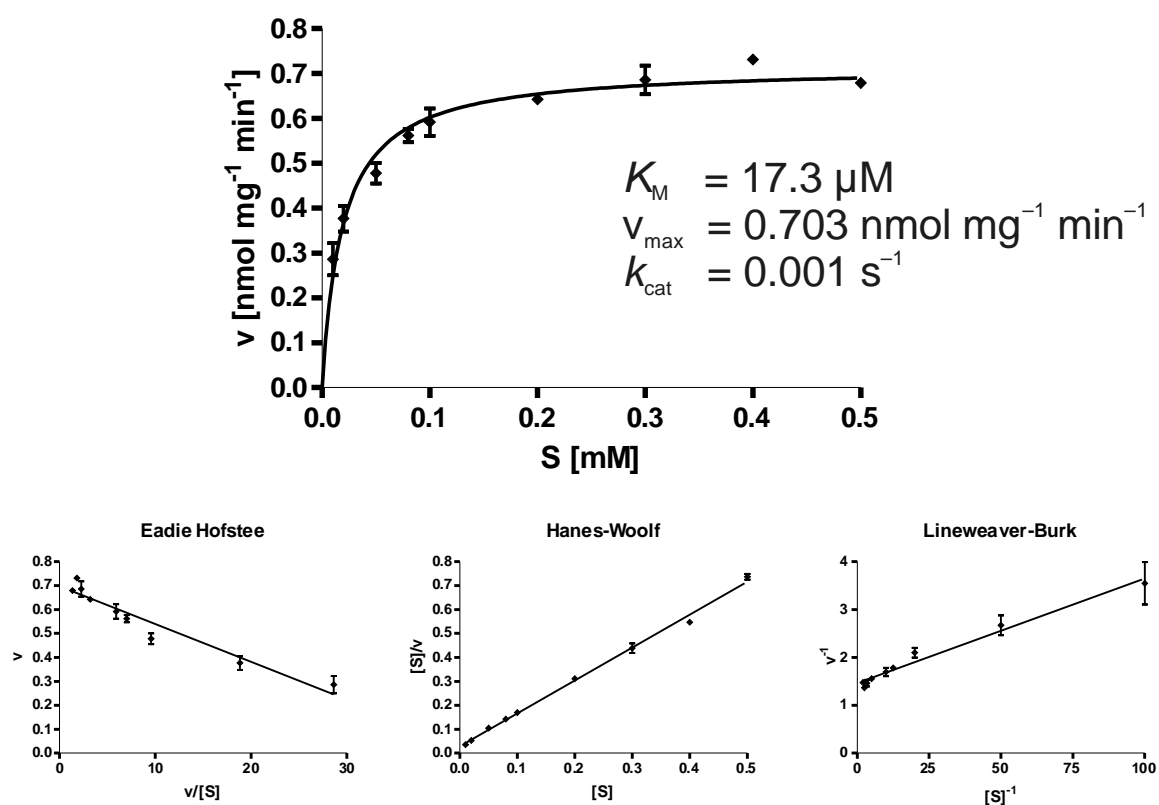

**Figure S17.** Determination of kinetic parameters for **1a**.

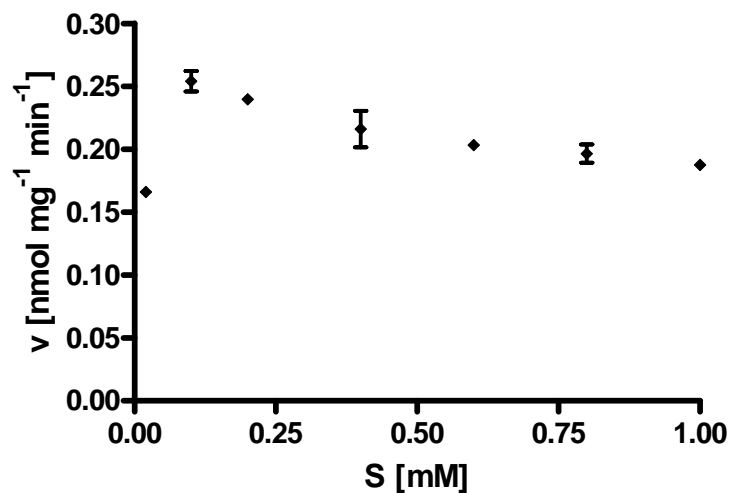

**Figure S18.** Determination of kinetic parameters for **2a**.

Inhibition occurred and maximal velocity was not reached under our assay conditions.

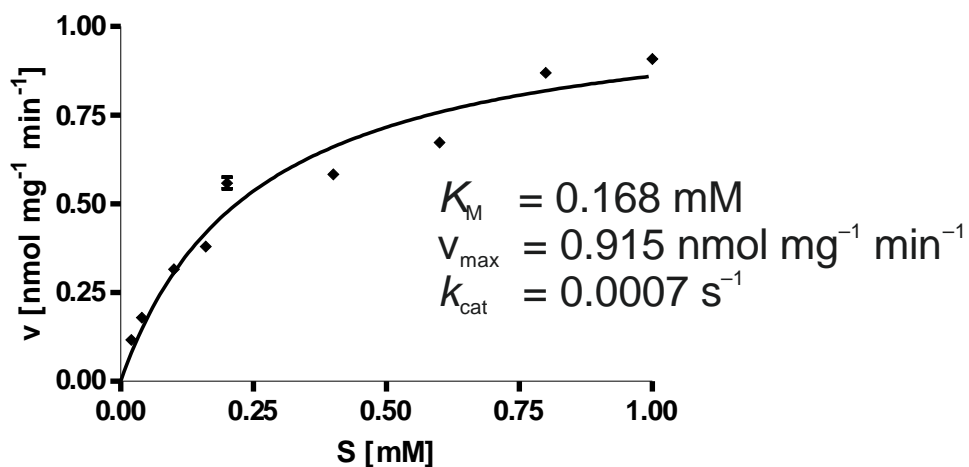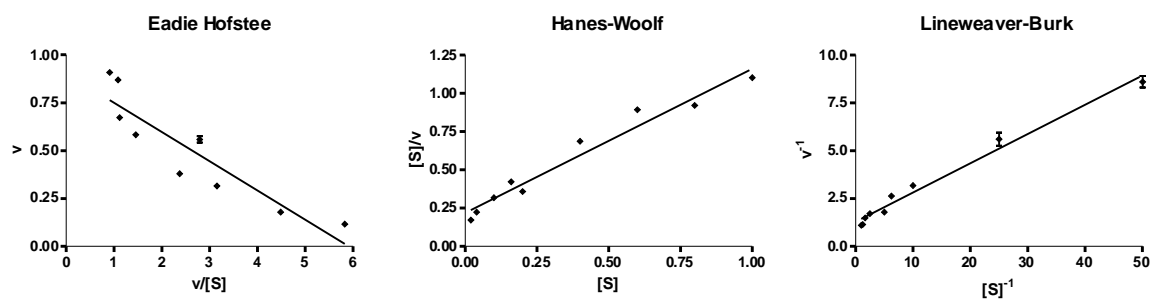

**Figure S19.** Determination of kinetic parameters for **3a**.



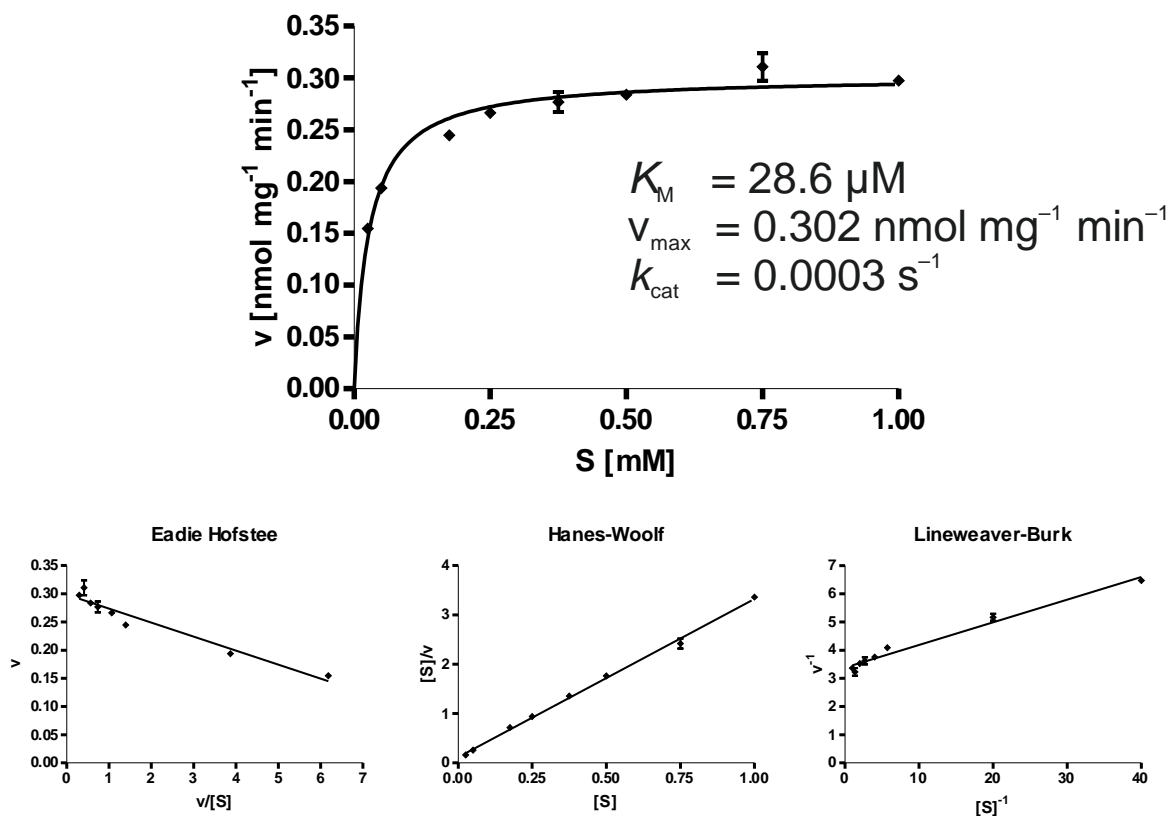

**Figure S20.** Determination of kinetic parameters for **4a**.

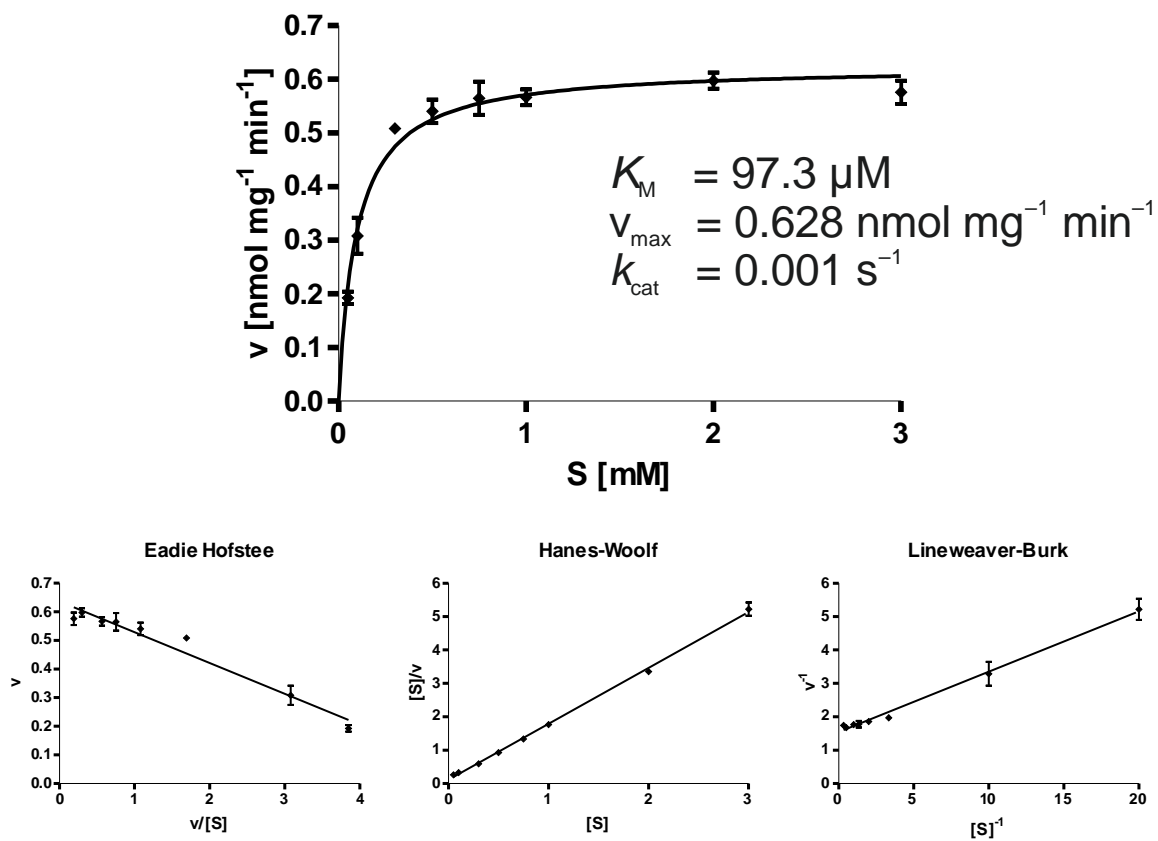

**Figure S21.** Determination of kinetic parameters for **DMAPP**.

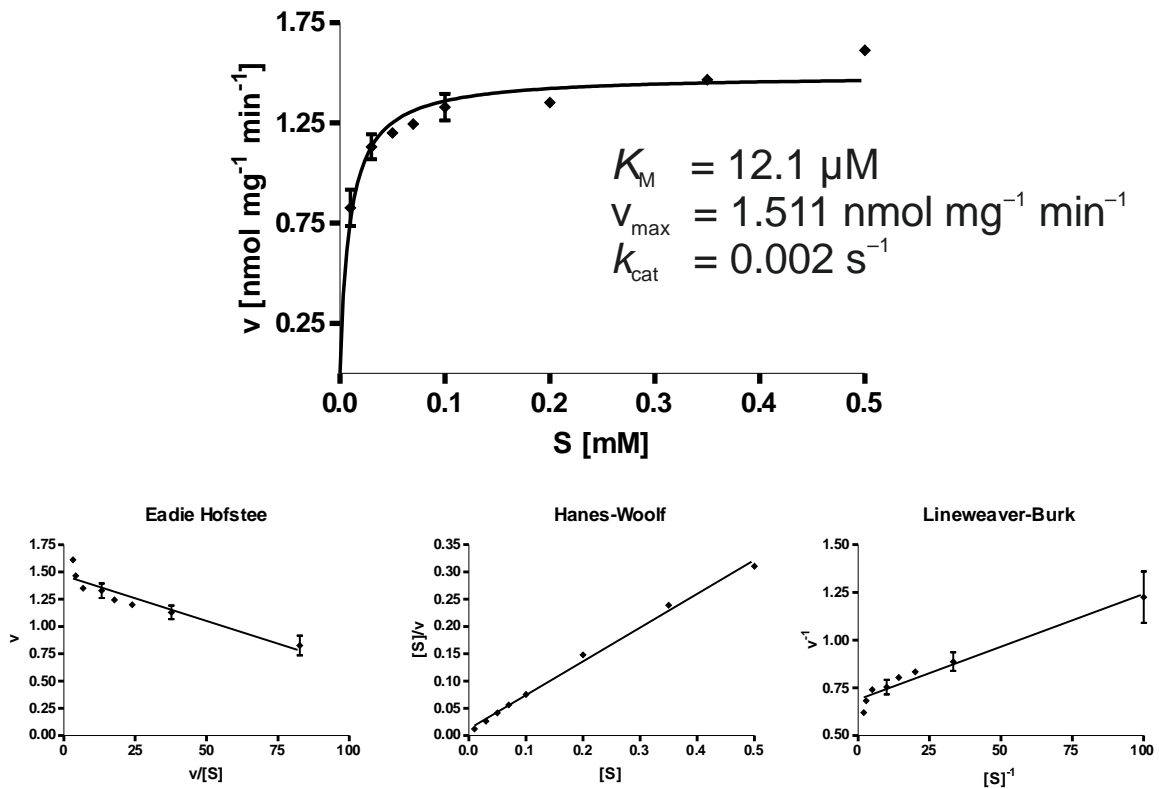

**Figure S22.** Determination of kinetic parameters for GPP.

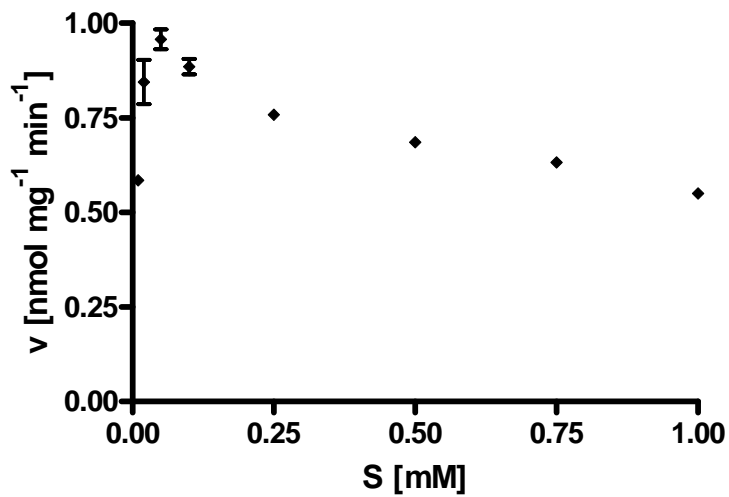

**Figure S23.** Determination of kinetic parameters for FPP.

Inhibition occurred and maximal velocity was not reached under our assay conditions.

|                |                                                                |     |
|----------------|----------------------------------------------------------------|-----|
| <b>FgaPT2</b>  | -----MKA-----NASSAEAYRVLS                                      | 16  |
| <b>7-DMATS</b> | MSIGAEIDSLVPAPQGLNGTAAGYPAKTQKE-----LSNGDFDAHDGLSLAQLTPYDVLVLT | 55  |
| <b>AnaPT</b>   | -----MSPLSMQTTDSVQGTAEEN-KSLETNGTSDNQQLPWKVLG                  | 37  |
| <b>FtmPT1</b>  | -----MPPAPPDQKPC-----HQLQPAPYRALS                              | 23  |
| <b>CdpNPT</b>  | -----MDGEMTASPPDISACDTSVAVDEQTTQSGSQQAPIPKDIAIYHTLTL           | 44  |
| <b>XptB</b>    | -----MVL-HKRSLSE---GGTSTQAWKVLVS                               | 22  |
| <b>TdiB</b>    | -----                                                          | 0   |
| <b>AstPT</b>   | -----MTIH                                                      | 4   |
|                |                                                                |     |
| <b>FgaPT2</b>  | RAFR-FDNE--DQKLWWHSTAPMFAKML-ETANYTTPCQYQYLITYKECVIPSLGCYPTN   | 72  |
| <b>7-DMATS</b> | AALP-LPAPASSTGFWWRETGPVMSKLL-AKANYPLYTHYKYLMLYHTHILPLLGP RPPL  | 113 |
| <b>AnaPT</b>   | KSLG-LPTI--EQEQYWLNTAPYFNNLL-IQCGYDVHQYQYLAFAFYHRHVLVPLGPFIRS  | 93  |
| <b>FtmPT1</b>  | ESIL-FGSV--DEERWWHSTAPILSRLL-ISSNYDVVDVQYKYLSLYRHLVLPALGPYPQR  | 79  |
| <b>CdpNPT</b>  | KALL-FPDI--DQYQHWHHVAPMLAKML-VDGKYSIHQQYELCLFAQLVAVPLGYPYSP    | 100 |
| <b>XptB</b>    | QTLF-SRGP--DVDAWQLTGRHLAVLL-DAAAYPIEKQYECLELHYHYAAPYLGPAPE     | 78  |
| <b>TdiB</b>    | -----MATEYWSRHLRSVLAPLFAAAGTYSPEQESHAFIDEHIAPNLGLPLWE          | 50  |
| <b>AstPT</b>   | TDLPPPEAKASDTEFWSEHIRSVIGPLMKATGYSYSGTAQEANRFLDNYIAPALGPHPTV   | 64  |
|                | : : : * : *                                                    |     |
|                |                                                                |     |
| <b>FgaPT2</b>  | S-----APRWLSILTRYGTPFELSLNC-----SNSIVRYTFEPINQHTGT-DKDPFN      | 118 |
| <b>7-DMATS</b> | ENSTHPSPSNAPWRSFLTDDFTPLPESWNVNGNSEAQSTIRLGIPIGFEAGA-AADPFN    | 172 |
| <b>AnaPT</b>   | SAEAN-----YISGSAEG-YPMELSVNY---QASKATVRLGCEPVGEFAGT-SQDPMN     | 142 |
| <b>FtmPT1</b>  | DPETG--IIATQWRSGMVLTLGLPIEFSSNNV-----ARALIRIGVDPVTADSGT-AQDPFN | 131 |
| <b>CdpNPT</b>  | GRDVI-----RCTLGGN-MTVELSQNF---QRSGSTTRIAFEPVRYQASV-GHDRFN      | 147 |
| <b>XptB</b>    | GAS-----PPTWKSMLQLDGTPEFESWKWNW-PGGEPEVRFGLPEIGPMAGT-SLDPLN    | 130 |
| <b>TdiB</b>    | PHGPY-----STPSSLVGSPPDPSINIV--SSGKAKVRFDFDVLSPDRT-GDDPFA       | 99  |
| <b>AstPT</b>   | AHPTY-----VAPCTIVGTLFNPSISLS--AKGKPTVRFDYDLPLPLDRASSDDPWG      | 114 |
|                | : * . . * :                                                    |     |
|                |                                                                |     |
| <b>FgaPT2</b>  | THAIWESLQHLPLEKSIDLEWFRHFHKLTLNSEEASAFLAHN---DRLVGGTIRTQNKL    | 175 |
| <b>7-DMATS</b> | QAAVTQFMHSYEATEVGTATLTLFEHFRNDMFVGPETYAALR-----AKIPEGEHTTQSFL  | 227 |
| <b>AnaPT</b>   | QFMTREVLGRLSRLDPTFDLRLFDYFDSQFSLTTSE-ANLAASKL-----IKQRRQSKVI   | 196 |
| <b>FtmPT1</b>  | TTRPKVYLETAARLLPGVDLTRFYEFETELVITKAEAEVLQAN---PDLFRSPWKSQILT   | 188 |
| <b>CdpNPT</b>  | RTSVNAFFSLOQLLVKSVNIELHLLSEHLTLTAKDERNLNEEQLTKYLTNFQVKTYVV     | 207 |
| <b>XptB</b>    | HLAMREILYKLVSSAVPGSDLTWTHHFLATLFDHDY--AKYTQK---AATMGSSIGTSLVY  | 185 |
| <b>TdiB</b>    | EGSAREILHRLADL-VGADTQWMGYLMDALYLTPAEAEVAK-----TKLPPGVAIPSSV    | 153 |
| <b>AstPT</b>   | EKGARTLFRRLAAA-LGADTQWLEYFMARFLSPAETEALR-----SKIPADLVIPSAMV    | 168 |
|                | : : :                                                          |     |
|                |                                                                |     |
| <b>FgaPT2</b>  | ALDL-KDGRFALKTYIYPALKAVVTGKTIHELVFSGVRRLAVREPRILPPLNMLEEYIRS   | 234 |
| <b>7-DMATS</b> | AFDL-DAGRVTTKAYFFPILMSLKTQSTTKVVSDSLHLALKSGVWGVTIAAMSVMEA      | 286 |
| <b>AnaPT</b>   | AFDL-KDGALIPKAYFFLKGKSLASGIPVQDVAFNAIESIAPKQIESPLRVL--RTFVTK   | 253 |
| <b>FtmPT1</b>  | AMDQKSGTVLVKAYFPQPKSAVTGRSTEDLLVNAIRKVD-REGRFETQLANLQRYIER     | 247 |
| <b>CdpNPT</b>  | ALDL-RKTGIVAKYFFPQKCAATGQTGSNACFGAIRAVDKDG---HLDSL--CQLIEA     | 261 |
| <b>XptB</b>    | SLEF-QRKSTGLKTYFHPKLDQQA-----FLDIP-----S-----WEA               | 218 |
| <b>TdiB</b>    | GFDF-DGPERTLKFIIPSVRKALATQDVSSELMKTLRGLQPLGSELVPA---MDLIAS     | 208 |
| <b>AstPT</b>   | GVAF-DDAQPRLLKAVPTMRRRAILEGRSSNEIAVEVLRGLSPLGSEITPA---IDMVEA   | 223 |
|                | .. : * : :                                                     |     |
|                |                                                                |     |
| <b>FgaPT2</b>  | RGS-----KSTASPRLVSCDLTSPAK---SRIKIYVLEEQ                       | 265 |
| <b>7-DMATS</b> | WIG---SY-----GGAAKTEMISVDCVNEAD---SRIKIYVRMP                   | 319 |
| <b>AnaPT</b>   | LFS---KP-----TVTSDVFLAVDCIVPEK---SRIKIYVADS                    | 286 |
| <b>FtmPT1</b>  | RRRGLHVPVGTADKPPATAA---DKAFDACSFFPHFLSTDLVPEPK---SRVVFYASER    | 300 |
| <b>CdpNPT</b>  | HFQ---QS-----KI--DDAFLCCDLVDPAH---TRFKVIADP                    | 292 |
| <b>XptB</b>    | SFRGLHPN-----SPSRTAVHEFLSTNPEGKLLKPFCLSVNDCSPAK---ARIKWFNSP    | 270 |
| <b>TdiB</b>    | YLST---R-----TNDAMLPLVGDIDCLDPRTHKNARVKCYLHTS                  | 244 |
| <b>AstPT</b>   | WIAA---S-----PHDPRMLVGMDCGEPD---SRIKIYLVTT                     | 256 |
|                | : * : * * *                                                    |     |

**Figure S24.** Multiple sequence alignment of AstPT and homologues by Clustal Omega. Identical amino acids in all proteins are marked with an asteriks. Identical amino acids which stabilise the substrates in the active site are highlighted by black boxes. TdiB (ABU51603.1) and XptB (BN001302.1) are from *Aspergillus nidulans*, AstPT (EAU29429.1) from *Aspergillus terreus*, FgaPT2 (AAX08549.1), FtmPT1 (AAX56314.1), 7-DMATS (ABS89001.1) and CdpNPT (ABR14712.1) are from *Aspergillus fumigatus*, AnaPT (EAW16181.1) is from *Neosartorya fischeri*.

|                |                                                                |     |
|----------------|----------------------------------------------------------------|-----|
| <b>FgaPT2</b>  | MVSLEAMEDLWTLGGRRRDASTLEGLSLVRELWDLIQLSPGLKS-YP----APYLP LG--  | 318 |
| <b>7-DMATS</b> | HTSLRKVKEAYCLGGRLTDENTKEGLKLLDELWRTVFGIDEDA-----ELP--          | 366 |
| <b>AnaPT</b>   | QLSLATLRFWTLGGSVTDSATMKGLEIAEELWRILQYDDAVCS-----H----          | 331 |
| <b>FtmPT1</b>  | HVNLQMVEDIWTFGGRLRRDPDALRGLLELLRHFWADIQMGEGYIT-MP----RGFCELG-- | 353 |
| <b>CdpNPT</b>  | LVTTLARAEHHTLGGRLTDEDAAVGLEIIRGLWSELGI IQGPLE-----PSA--        | 339 |
| <b>XptB</b>    | HTNFRAIREIMTLGGRIADTETRTRK--QFSELFNLLKTVTEEHADFPETSEFPYVPNMGD  | 328 |
| <b>TdiB</b>    | SNSFAVVRDVLTLGGRLSDDTSLKRVETLKSVMPLLINELEGPQSDAATMDESWSKPE--   | 302 |
| <b>AstPT</b>   | KNSWATVQDVMTLGGRLDDEPTRKQLALLRK IWPYLINEPDN---TRIADENWCKPE--   | 310 |
|                | . : : ** * :                                                   |     |
| <b>FgaPT2</b>  | -VIPD-----E-RLPLMANFTLH-QNDPVPEPQVYFTTFGMND--MAVADALTTFFERRG   | 368 |
| <b>7-DMATS</b> | -Q-NS-----HRTAGTIFNFE LR-PGKWFPEPKVYLPVRHYCESDMQIASRLQTFFGRLG  | 418 |
| <b>AnaPT</b>   | ---SN-----MDQLPLVVNYELS-SGSATPKPQLYMLPLHGRND--EAMANALTKFWDYLG  | 380 |
| <b>FtmPT1</b>  | -KSSA-----GFEAPMMFHFHLDGSSQSPFPDPQMYVCVFGMNS--RKLVEGLTTFYRRVG  | 405 |
| <b>CdpNPT</b>  | -M-ME-----KGLLPIMLNEMK-AGQRLPKPKLYMPLTGIPE--TKIARIMTAFQQRHD    | 389 |
| <b>XptB</b>    | SIIPNFADAPMLKGCVYFFDIA-PGRNLPKIKVYFPVRNHCNRNDLAVTQNLNRWLESRG   | 387 |
| <b>TdiB</b>    | -RLNR-----TGYSGIQYTIETIT-PGQAIPTKIYVPLFQYTDSSVAERNFESALKKLG    | 355 |
| <b>AstPT</b>   | -RMPR-----VGFFGLMYSLEIK-PGRPTPEVKLYVPLFQYAESWAI AENNMETVLKLLD  | 363 |
|                | : * : : *                                                      |     |
| <b>FgaPT2</b>  | --WSEMARTYETTLKSYYPHADHDKLNYLHAMISFSYR-DRTPYLSVYLQSFETG-----   | 420 |
| <b>7-DMATS</b> | --WHNMEKDYCKHLEDLFPHHPLSSSTGHTHTFLSFSYKKQKGVYMTMYNLRVYS-----   | 471 |
| <b>AnaPT</b>   | --WKGAAQYKLDLYANNPCRNLAETTTVQRWVAFSYTESGGAYLTVYFHAVGGM-----    | 433 |
| <b>FtmPT1</b>  | --WEEMASHYQANFLANYPDEDFEKA AHLCAVVSFAYK-NGGAYVTLNHSFNPNV-----  | 457 |
| <b>CdpNPT</b>  | --MPEQAEVFMENLQAYYEGKNLEEA TRYQAWLSFAYTKEKGPYLSIYYFWPE-----    | 440 |
| <b>XptB</b>    | --RGQYGAAFGRALETIADYRRLLEDSSGLLSFLSCQFMEDGELDLTSYFNPQAFH-----  | 440 |
| <b>TdiB</b>    | NEWGLSG-KYRSVMQEIFKD---VENYQTYASFYSYTEGKGVYTTSYVAMP IKDEGGGS   | 410 |
| <b>AstPT</b>   | IDWGHSG-KYRQAMEMTFGK---GNSYQGIFVAYSYSERTGGYINSYVSMVPKDVPAHA    | 418 |
|                | : : : : *                                                      |     |
| <b>FgaPT2</b>  | ---DWAVANLSESKVKCQDAACQPTALPPDL SKTGVYYSGLH                    | 459 |
| <b>7-DMATS</b> | ---T-----                                                      | 472 |
| <b>AnaPT</b>   | ---KG---NL-----                                                | 437 |
| <b>FtmPT1</b>  | ---GDVSFPN-----                                                | 464 |
| <b>CdpNPT</b>  | -----                                                          | 440 |
| <b>XptB</b>    | ---SGRLTHRRA-TRRRGDDRW-----                                    | 458 |
| <b>TdiB</b>    | LAGDFGFRN-----                                                 | 419 |
| <b>AstPT</b>   | FTGDYV-----                                                    | 424 |

Figure S24. Continued.
